# Supplementary material
Source: PubMed Central journal article supplement (PMC4083782)
Supplement: rspb20140339supp1.pdf [file rspb20140339supp1.pdf]

## Electronic Supplemental Material (ESM)

**Table 1.** Geographic information for islets sampled

| Island name | GPS Location |            | Area ( $km^2$ ) | Maximum Island Elevation ( $m$ ) | Distance from closest landmass ( $m$ ) | Maximum Water Depth ( $m$ ) | Duration of isolation ( $yr$ ) |
|-------------|--------------|------------|-----------------|----------------------------------|----------------------------------------|-----------------------------|--------------------------------|
|             | North        | West       |                 |                                  |                                        |                             |                                |
| Ovriokastro | 37 °9.1 ′    | 25 °17.7 ′ | 0.22            | 23                               | 732                                    | 7.2                         | 5,600                          |
| Aspronissi  | 37 °2.8 ′    | 25 °21.1 ′ | 0.01            | 6                                | 333                                    | 11                          | 6,100                          |
| Parthenos   | 37 °1.7 ′    | 25 °21.6 ′ | 0.004           | 9                                | 116                                    | 8                           | 5,650                          |
| Mando       | 37 °5.3 ′    | 25 °21.7 ′ | 0.025           | 11                               | 20                                     | 0.4                         | 5                              |

\*Please note the name of Mando appear as Prokopios in the raw dataset

**Table 2.** Information on physical aspects of the study sites on Naxos.

| Site                         | Abbreviation | Elevation ( $masl.$ ) | GPS Location |            | Slope Aspect | Wall Direction |
|------------------------------|--------------|-----------------------|--------------|------------|--------------|----------------|
|                              |              |                       | North        | West       |              |                |
| <i>Low Cat Density Sites</i> |              |                       |              |            |              |                |
| 1. South Slope               | SO           | 642                   | 37 °6.5 ′    | 25 °32.0 ′ | South        | East to West   |
| 2. North Slope               | NS           | 636                   | 37 °6.3 ′    | 25 °31.6 ′ | Northeast    | NE to SW       |
| 3. Moni Olive                | MO           | 304                   | 37 °4.3 ′    | 25 °29.3 ′ | 0            | East to West   |
| 4. Marina                    | MR           | 370                   | 37 °2.2 ′    | 27 °27.1 ′ | Northwest    | NE to SW       |
| 5. Small Slope               | SS           | 214                   | 37 °2.1 ′    | 25 °26.9 ′ | West         | North to South |
| 6. Gas Station               | GS           | 251                   | 37 °2.9 ′    | 25 °27.4 ′ | West         | North to South |
| 7. Kanakali                  | KN           | 87                    | 37 °3.1 ′    | 25 °25.7 ′ | North        | North to South |
| 8. Halkio Olive              | HA           | 224                   | 37 °2.6 ′    | 25 °28.7 ′ | 0            | North to South |
| 9. Well                      | WE           | 170                   | 37 °2.0 ′    | 25 °25.3 ′ | North        | East to West   |

| <i>High Cat Density Sites</i> |     |     |         |          |       |                |
|-------------------------------|-----|-----|---------|----------|-------|----------------|
| 10. Glinado                   | GL  | 77  | 37 °4.4 | 25 °24.1 | North | East to West   |
| 11. Filoti                    | FL  | 361 | 37 °3.1 | 25 °29.8 | 0     | NE to SW       |
| 12. Vivlos                    | VI  | 130 | 37 °3.7 | 25 °24.5 | West  | North to South |
| 13. Plantation                | PL  | 190 | 37 °2.6 | 25 °26.2 | 0     | East to West   |
| 14. Angidia                   | AG  | 11  | 37 °5.7 | 25 °26.0 | 0     | North to South |
| 15. Kinidaros                 | KN  | 433 | 37 °6.2 | 25 °28.7 | West  | North to South |
| 16. Naxos                     | NA  | 95  | 37 °6.4 | 25 °22.8 | 0     | North to South |
| 17. Ag. Thaleleos             | AT  | 98  | 37 °5.8 | 25 °25.2 | South | East to West   |
| 18. Vivlos 2                  | VI2 | 135 | 37 °3.7 | 25 °24.6 | South | North to South |

**Table 3.** Comparison of environmental factors in high cat density sites versus low cat density sites on Naxos (Mann-Whitney U test).

|                                        | Low cat density sites | High cat density sites | <i>p</i> value |
|----------------------------------------|-----------------------|------------------------|----------------|
| Canopy coverage (%)                    | 0.17±0.09             | 0.30±0.10              | 0.436          |
| Understory coverage (%)                | 0.66±0.03             | 0.66±0.03              | 0.863          |
| Understory biomass (g/m <sup>2</sup> ) | 227.94±6.69           | 243.75±6.25            | 0.486          |
| Arthropod biomass (g/pitfall)          | 4.71±1.12             | 4.95±0.97              | 0.545          |

Both vegetation structure and arthropod biomass did not differ between High Cat Density and Low Cat Density sites. We also did not find significant differences in canopy cover (Mann-Whitney U test,  $Z=-0.222$ ,  $p=0.436$ ,  $n=27$ ), understory coverage (Mann-Whitney U test,  $Z=-0.808$ ,  $p=0.863$ ,  $n=27$ ), understory biomass (Mann-Whitney U test  $Z=-0.697$ ,  $p=0.486$ ,  $n=27$ ), and mean arthropod biomass (Mann-Whitney U test,  $Z=-0.605$ ,  $p=0.545$ ,  $n=27$ ) between these two kinds of sites (Table 3). Lastly, there were no differences in the structure of the refugia present, with dry stone wall heights not differing significantly

between high and low density cat sites (High Cat Density vs. Low Cat Density sites:  
102.1  $\pm$ 9.35cm vs. 91.1  $\pm$ 4.66cm; Mann-Whitney U test, Z=-.751, p=0.489, n=27).

**Table 4.** Site characteristics given as means  $\pm$  S.E.

| Site name                     | Wall Height (cm) | Canopy Cover (%) | Understory Coverage (%) | Understory Biomass (g/0.16m <sup>2</sup> ) | Arthropods Biomass (g/pitfall) | Cat Density (cats/km) | Lizard density (lizards/100m wall) |
|-------------------------------|------------------|------------------|-------------------------|--------------------------------------------|--------------------------------|-----------------------|------------------------------------|
| <i>Low Cat Density sites</i>  |                  |                  |                         |                                            |                                |                       |                                    |
| South Slope                   | 112.3 $\pm$ 4.1  | 0.43 $\pm$ 0.03  | 0.83 $\pm$ 0.03         | 52.61 $\pm$ 8.41                           | 7.166 $\pm$ 3.627              | 0                     | 16.3 $\pm$ 1.2                     |
| North Slope                   | 79.3 $\pm$ 9.4   | 0.67 $\pm$ 0.13  | 0.57 $\pm$ 0.12         | 22.23 $\pm$ 7.54                           | 8.663 $\pm$ 6.542              | 0                     | 12.3 $\pm$ 0.7                     |
| Moni Olive                    | 107.7 $\pm$ 3.3  | 0.67 $\pm$ 0.13  | 0.07 $\pm$ 0.07         | 1.90 $\pm$ 1.01                            | 0.164 $\pm$ 0.060              | 0                     | 14.3 $\pm$ 1.2                     |
| Marina                        | 83.0 $\pm$ 12.5  | 0.27 $\pm$ 0.03  | 0.30 $\pm$ 0.06         | 10.17 $\pm$ 5.54                           | 1.061 $\pm$ 0.690              | 0                     | 6.0 $\pm$ 1.0                      |
| Small Slope                   | 67.3 $\pm$ 11.8  | 0.00 $\pm$ 0.00  | 0.73 $\pm$ 0.03         | 22.30 $\pm$ 6.40                           | 0.607 $\pm$ 0.274              | 0                     | 7.7 $\pm$ 0.3                      |
| Gas Station                   | 88.7 $\pm$ 7.8   | 0.03 $\pm$ 0.03  | 0.97 $\pm$ 0.03         | 46.26 $\pm$ 12.20                          | 11.304 $\pm$ 2.433             | 0                     | 8.0 $\pm$ 1.0                      |
| Kanakali                      | 93.7 $\pm$ 1.2   | 0.07 $\pm$ 0.07  | 0.97 $\pm$ 0.03         | 54.98 $\pm$ 5.05                           | 5.642 $\pm$ 2.008              | 0                     | 11.0 $\pm$ 2.1                     |
| Halkio olive                  | 98.3 $\pm$ 8.5   | 0.53 $\pm$ 0.09  | 0.57 $\pm$ 0.12         | 46.43 $\pm$ 2.74                           | 0.286 $\pm$ 0.097              | 0                     | 12.3 $\pm$ 0.7                     |
| Well                          | 89.3 $\pm$ 8.1   | 0.00 $\pm$ 0.00  | 0.90 $\pm$ 0.06         | 71.39 $\pm$ 7.66                           | 7.526 $\pm$ 2.665              | 0                     | 5.0 $\pm$ 1.2                      |
| <i>High Cat Density sites</i> |                  |                  |                         |                                            |                                |                       |                                    |
| Glinado                       | 116.7 $\pm$ 15.3 | 0.03 $\pm$ 0.03  | 0.70 $\pm$ 0.06         | 40.31 $\pm$ 5.57                           | 1.759 $\pm$ 0.514              | 1.3 $\pm$ 0.9         | 6.3 $\pm$ 1.2                      |
| Filoti                        | 97.0 $\pm$ 5.7   | 0.70 $\pm$ 0.06  | 0.33 $\pm$ 0.03         | 25.89 $\pm$ 5.59                           | 0.670 $\pm$ 0.699              | 3.7 $\pm$ 0.9         | 8.0 $\pm$ 2.9                      |
| Vivlos                        | 57.7 $\pm$ 5.0   | 0.03 $\pm$ 0.03  | 0.93 $\pm$ 0.03         | 54.10 $\pm$ 3.35                           | 2.273 $\pm$ 1.220              | 1.7 $\pm$ 0.3         | 7.8 $\pm$ 0.3                      |
| Plantation                    | 78.0 $\pm$ 3.2   | 0.03 $\pm$ 0.03  | 0.90 $\pm$ 0.06         | 46.17 $\pm$ 13.37                          | 4.467 $\pm$ 2.011              | 2.3 $\pm$ 0.9         | 3 $\pm$ 0.6                        |
| Angidia                       | 84.7 $\pm$ 9.9   | 0.07 $\pm$ 0.07  | 0.53 $\pm$ 0.07         | 47.92 $\pm$ 14.66                          | 21.796 $\pm$ 13.666            | 0.7 $\pm$ 0.3         | 10.3 $\pm$ 1.8                     |
| Kinidaros                     | 122.3 $\pm$ 3.7  | 0.00 $\pm$ 0.00  | 0.97 $\pm$ 0.03         | 64.20 $\pm$ 7.47                           | 2.985 $\pm$ 1.006              | 0.7 $\pm$ 0.3         | 4.0 $\pm$ 1.5                      |
| Naxos                         | 87.7 $\pm$ 3.8   | 0.00 $\pm$ 0.00  | 0.73 $\pm$ 0.03         | 36.80 $\pm$ 2.25                           | 4.776 $\pm$ 1.789              | 1.7 $\pm$ 0.3         | 1 $\pm$ 0.6                        |
| Ag.Thaleios                   | 131.7 $\pm$ 7.3  | 0.03 $\pm$ 0.03  | 0.47 $\pm$ 0.09         | 30.53 $\pm$ 2.42                           | 3.613 $\pm$ 0.335              | 2.3 $\pm$ 0.3         | 2 $\pm$ 0.6                        |
| Vivlos 2                      | 143.3 $\pm$ 12.0 | 0.60 $\pm$ 0.06  | 0.37 $\pm$ 0.07         | 5.12 $\pm$ 1.10                            | 0.820 $\pm$ 0.385              | 0.3 $\pm$ 0.3         | 1.7 $\pm$ 1.2                      |

**Table 5**

Behavioral data and antipredator defenses in the field and in the laboratory. Field autotomy rates were quantified as the fraction of individuals with autotomized tails observed in the field, while laboratory autotomy rate was the fraction of individuals that shed their tails during a standardized autotomy test. Refuge use and approach behaviors in the cat experiment were recorded as mean percentage of refuge use or approaches towards the decoy over the course of three trials.

| Site name                     | Field                                     |                         |                          | Laboratory               |                                  | Cat Experiment |                 |
|-------------------------------|-------------------------------------------|-------------------------|--------------------------|--------------------------|----------------------------------|----------------|-----------------|
|                               | Flight Initiation Distance to Refuge (cm) | Distance to Refuge (cm) | Autotomy Rate (fraction) | Autotomy Rate (fraction) | -Flight Initiation Distance (cm) | Refuge Use (%) | Approaching (%) |
| <i>Low Cat Density sites</i>  |                                           |                         |                          |                          |                                  |                |                 |
| South Slope                   | 137.0±8.7                                 | 30.2±3.1                | 0.268                    | 0.357                    | 28.6±6.1                         | 0.472±0.059    | 0.271±0.058     |
| North Slope                   | 119.9±5.8                                 | 37.8±4.5                | 0.100                    | 0.300                    | 24.6±5.0                         | 0.400±0.064    | 0.200±0.052     |
| Moni                          | 131.4±4.1                                 | 60.5±7.7                | 0.360                    | 0.400                    | 40.2±5.5                         | 0.550±0.065    | 0.333±0.061     |
| <i>High Cat Density sites</i> |                                           |                         |                          |                          |                                  |                |                 |
| Glinado                       | 171.5±15.3                                | 27.8±5.4                | 0.300                    | 0.632                    | 51.5±7.6                         | 0.333±0.061    | 0.250±0.056     |
| Filoti                        | 155.7±7.1                                 | 25.8±3.7                | 0.571                    | 0.667                    | 38.4±6.9                         | 0.467±0.065    | 0.133±0.044     |
| Vivilos                       | 168.0±62.2                                | 26.1±15.6               | 0.308                    | 0.600                    | 51.5±7.7                         | 0.367±0.063    | 0.083±0.036     |
| <i>Islets</i>                 |                                           |                         |                          |                          |                                  |                |                 |
| Aspronissi                    | 111.4±7.5                                 | 43.4±6.4                | 0.228                    | 0.256                    | 18.0±4.5                         | 0.267±0.058    | 0.300±0.060     |
| Ovriokastro                   | 123.6±9.8                                 | 46.6±7.7                | 0.217                    | 0.222                    | 13.2±3.1                         | 0.067±0.032    | 0.300±0.060     |
| Parthenos                     | 68.7±4.3                                  | 47.8±6.0                | 0.146                    | 0.217                    | 38.1±6.1                         | 0.283±0.059    | 0.450±0.065     |
| Mando                         | 145.7±10.5                                | 89.6±10.9               | 0.256                    | 0.250                    | 40.6±5.7                         | 0.519±0.069    | 0.500±0.069     |
